# Supplementary material for: Synthesis, Crystal Structure, Hirshfeld Surface Analysis, Energy Framework Calculations, and Halogen Bonding Investigation of Benzene-1,3,5-triyltris((4-chlorophenyl)methanone)
Source: MDPI journal article supplement (doi:10.3390/cryst14010017), 2023-12-24
Supplement: s1 [file s1]

**Supporting Information:**

**Synthesis, Crystal Structure, Hirshfeld Surface Analysis,  
Energy Framework calculations, and halogen Bonding  
Investigation of  
Benzene-1,3,5-triyltris((4-chlorophenyl)methanone)**

Hawazen M. Hassanain \*, Samah AlSharif, Huda A. AlGhamdi, Layla M. Nahari, Ahlam I. Al-Sulami,  
Sameera M. Mousally and Khadijah M. Al-Zaydi \*

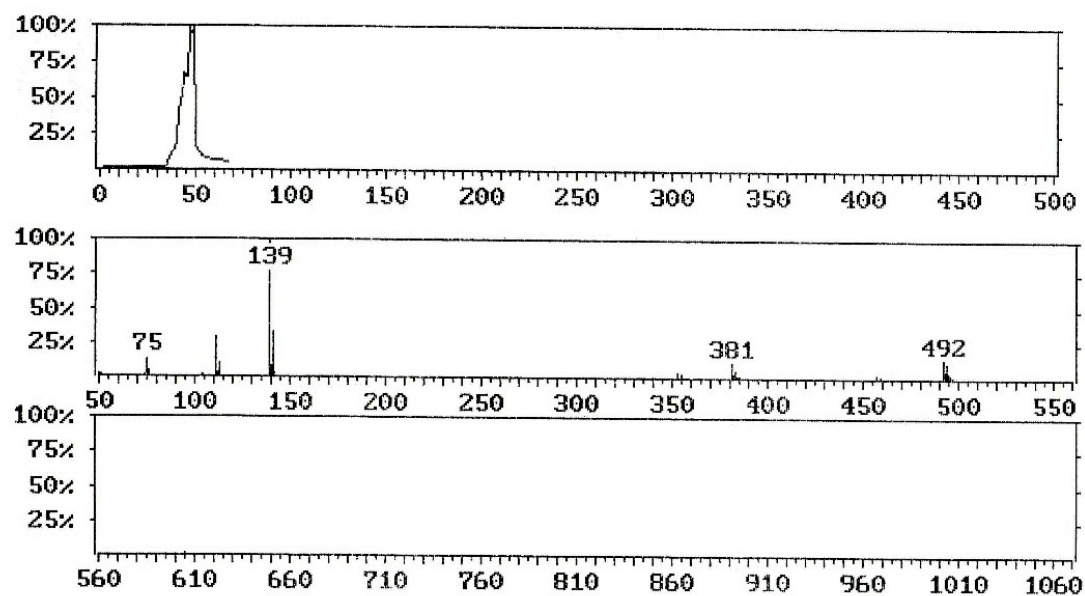

**Figure S1** MS. of Benzene-1,3,5-triyltris((4-chlorophenyl)methanone).

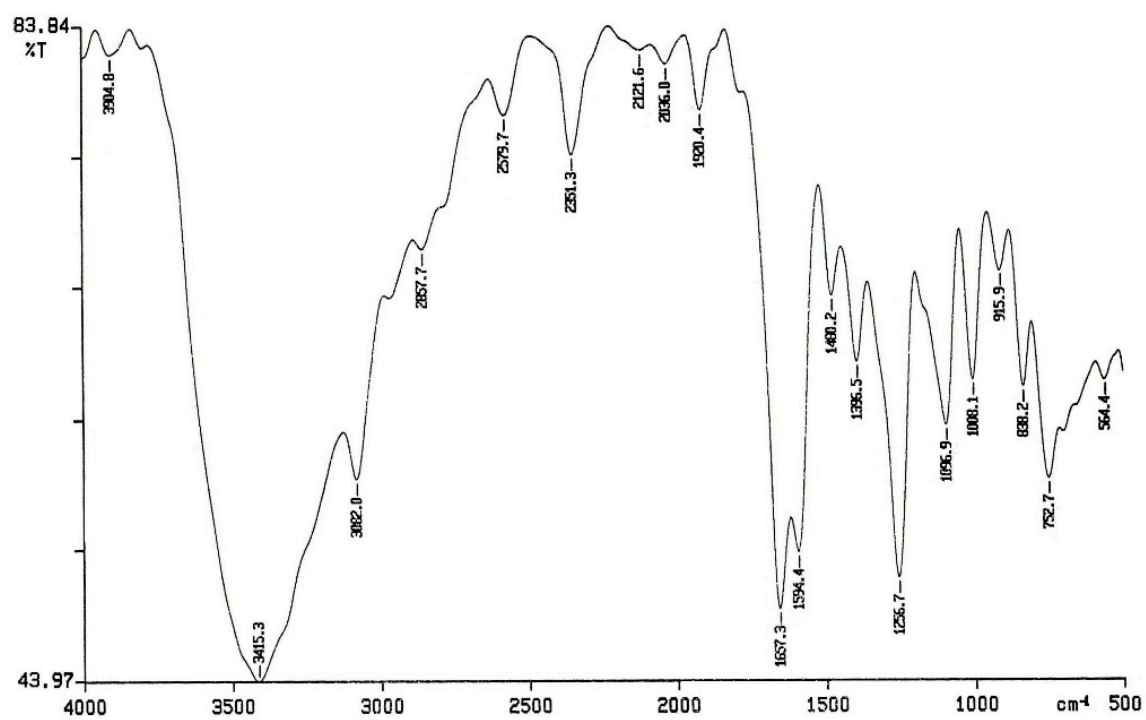

**Figure S2** IR. of Benzene-1,3,5-triyltris((4-chlorophenyl)methanone).

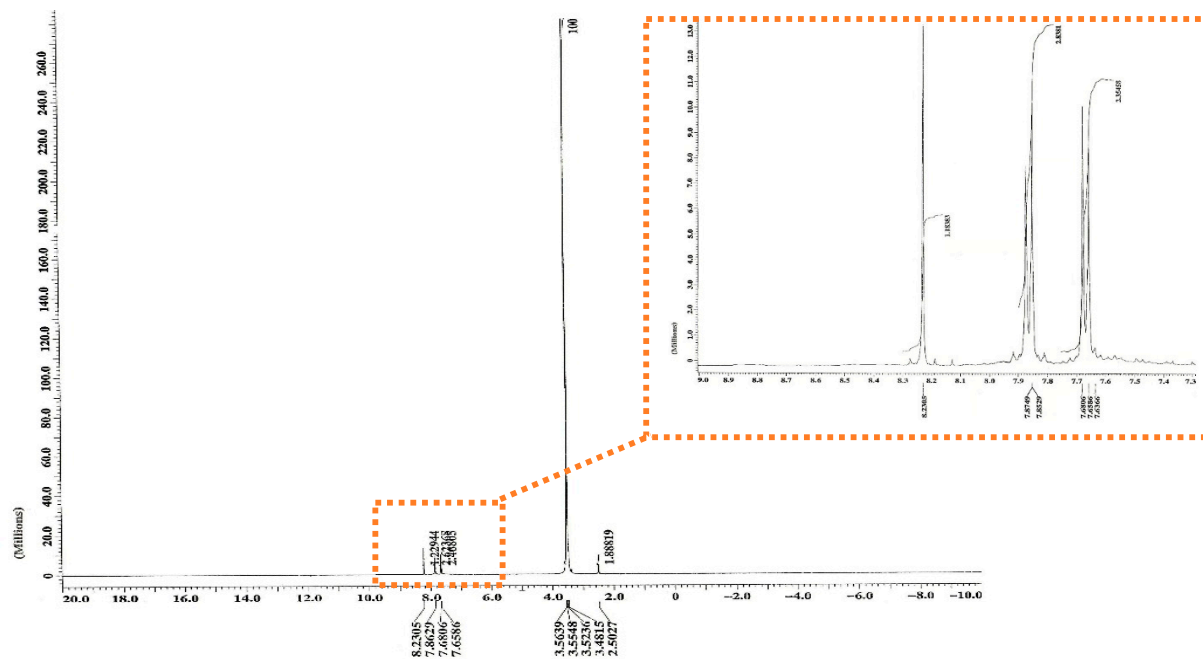

**Figure S3**  $^1\text{H}$ -NMR. of Benzene-1,3,5-triyltris((4-chlorophenyl)methanone).

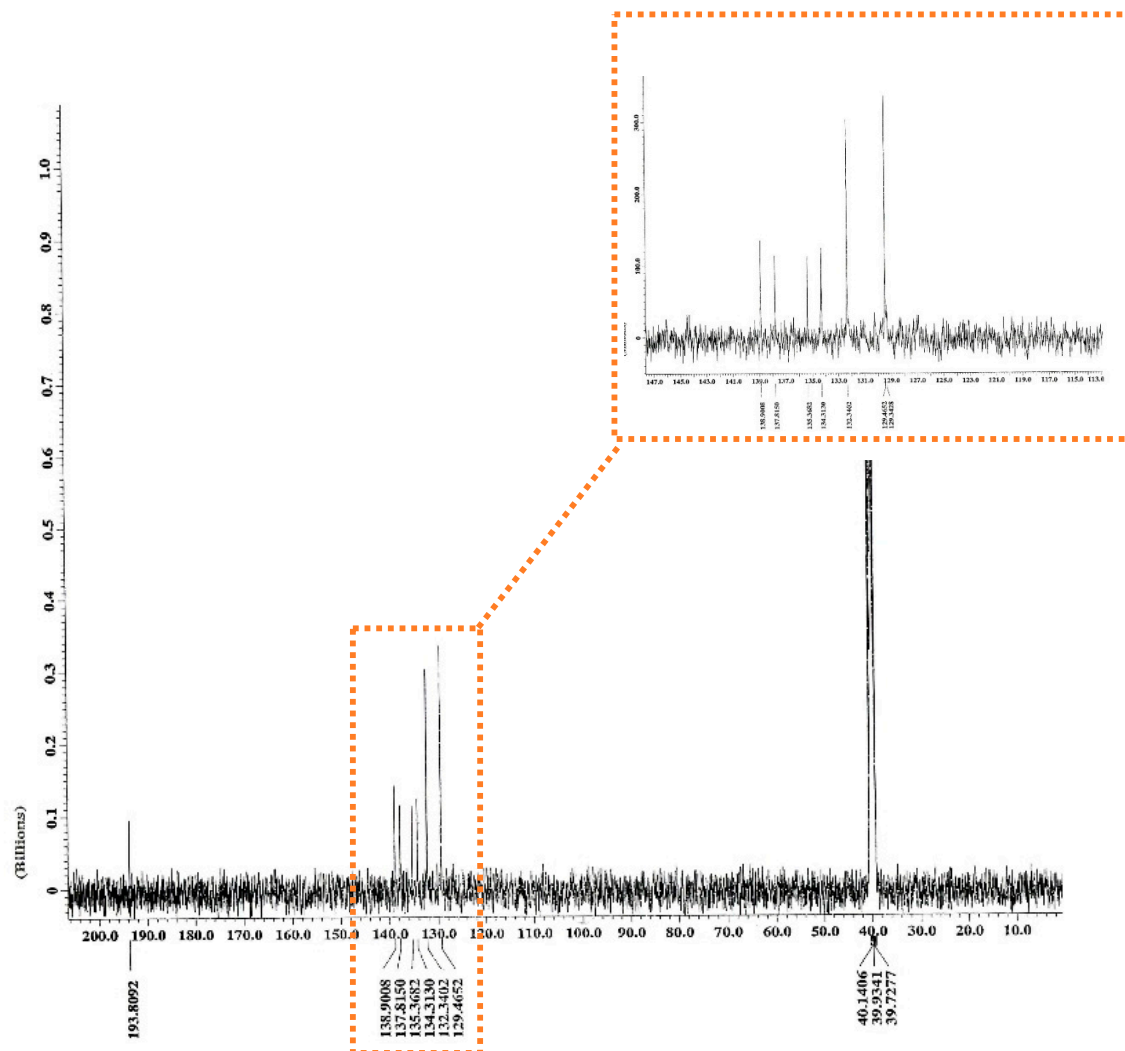

Figure S4  $^{13}\text{C}$ -NMR. of Benzene-1,3,5-triyltris((4-chlorophenyl)methanone).

(a)

(b)

(c)

1

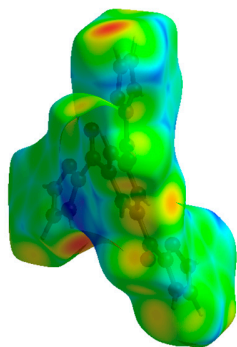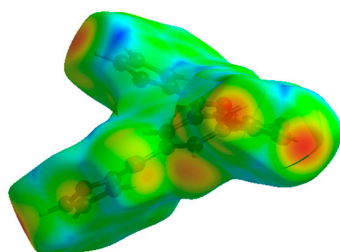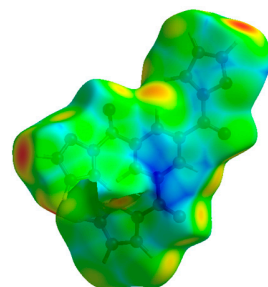

2

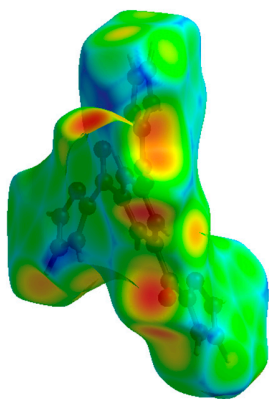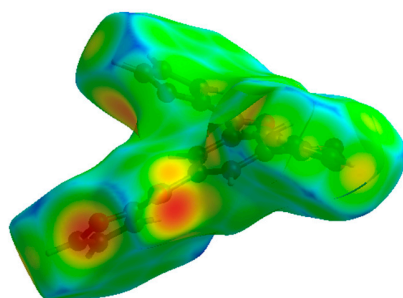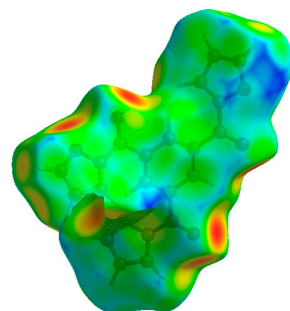

3

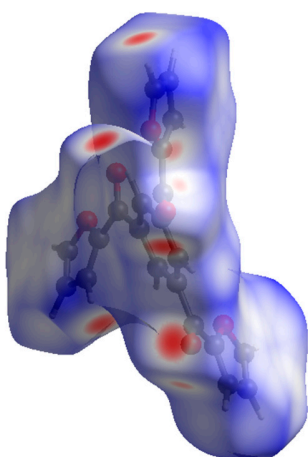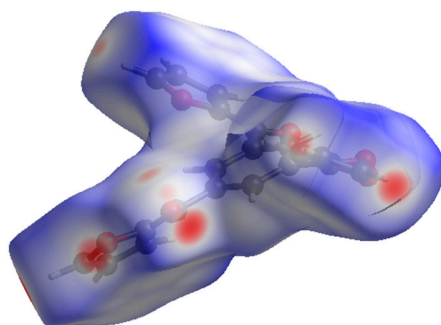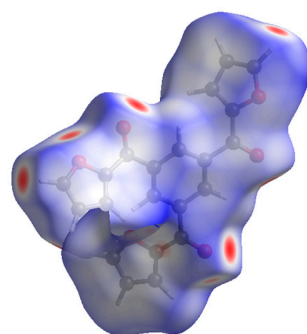

**Figure S5** Hirshfeld surfaces mapped of compound **A** with (1)  $d_i$ , (2)  $d_e$ , and (3)  $d_{\text{norm}}$  red spots corresponding to close contact.

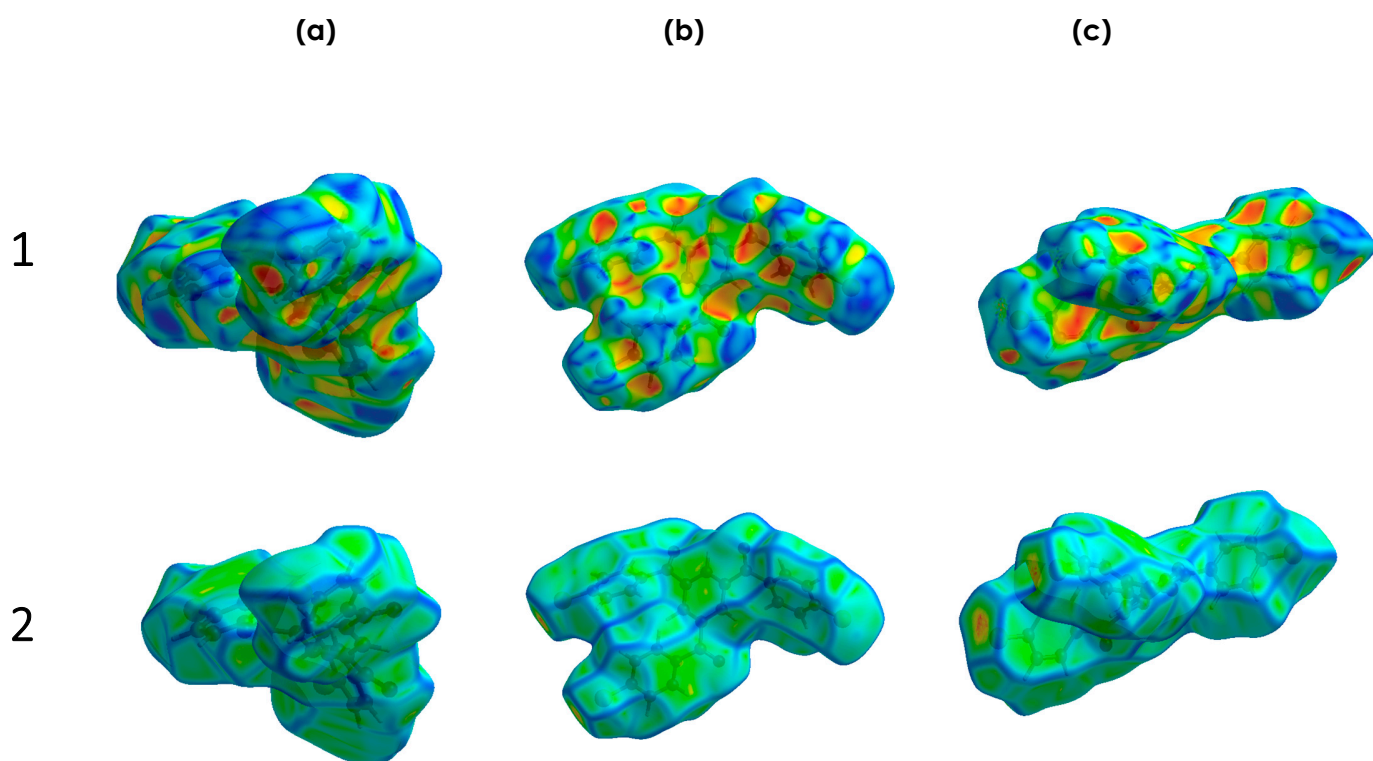

**Figure S6** Hirshfeld surfaces of compound **A** mapped with (1) shape index surfaces for compounds **2P** along a, b, and c axis. Shape index surfaces (top, color code: hollow—red; bumps—blue). (2) Hirshfeld surfaces mapped with curvedness surfaces for compounds **2P** along a, b, and c axis. Curvedness surfaces (bottom, color code: edges—blue; flat regions—green)

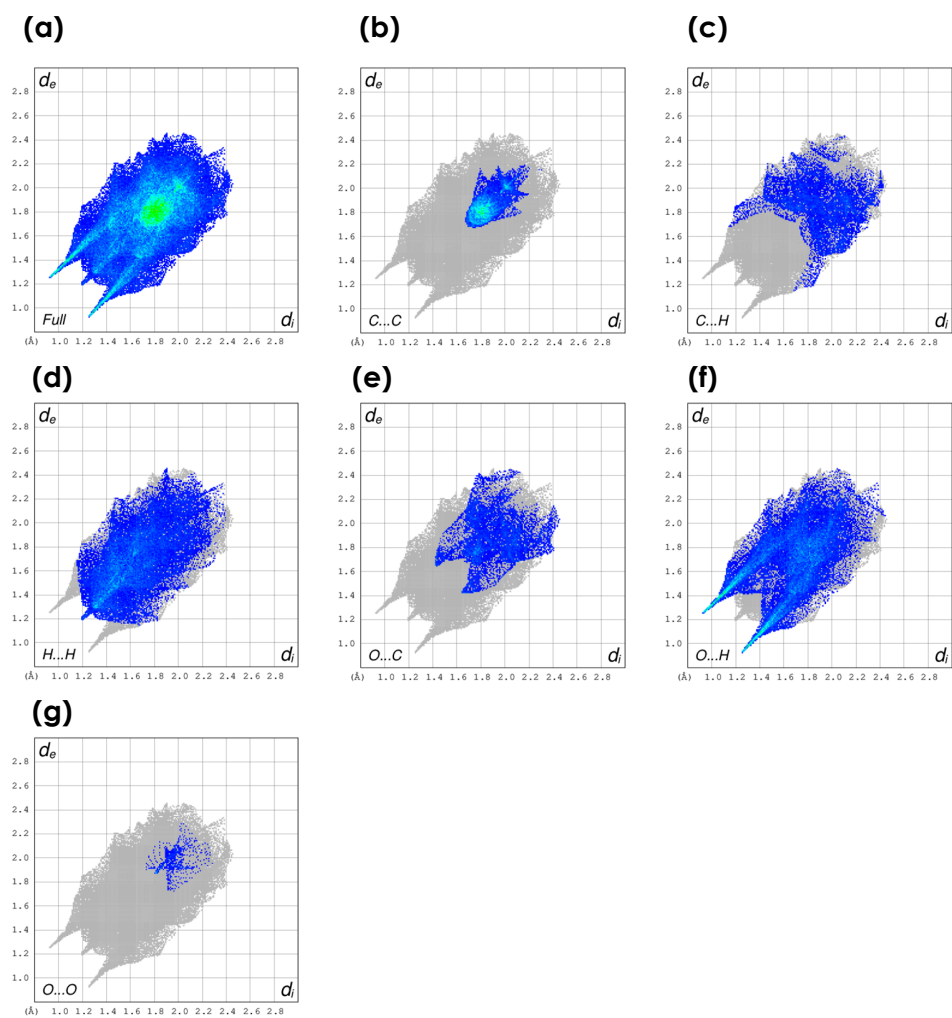

**Figure S7** 2D fingerprint plots of compound **A** highlighting (a)all interaction, (b) C···C, (c) C···H, (d) H···H, (e)O···C, (f) O···H, (g) O···O



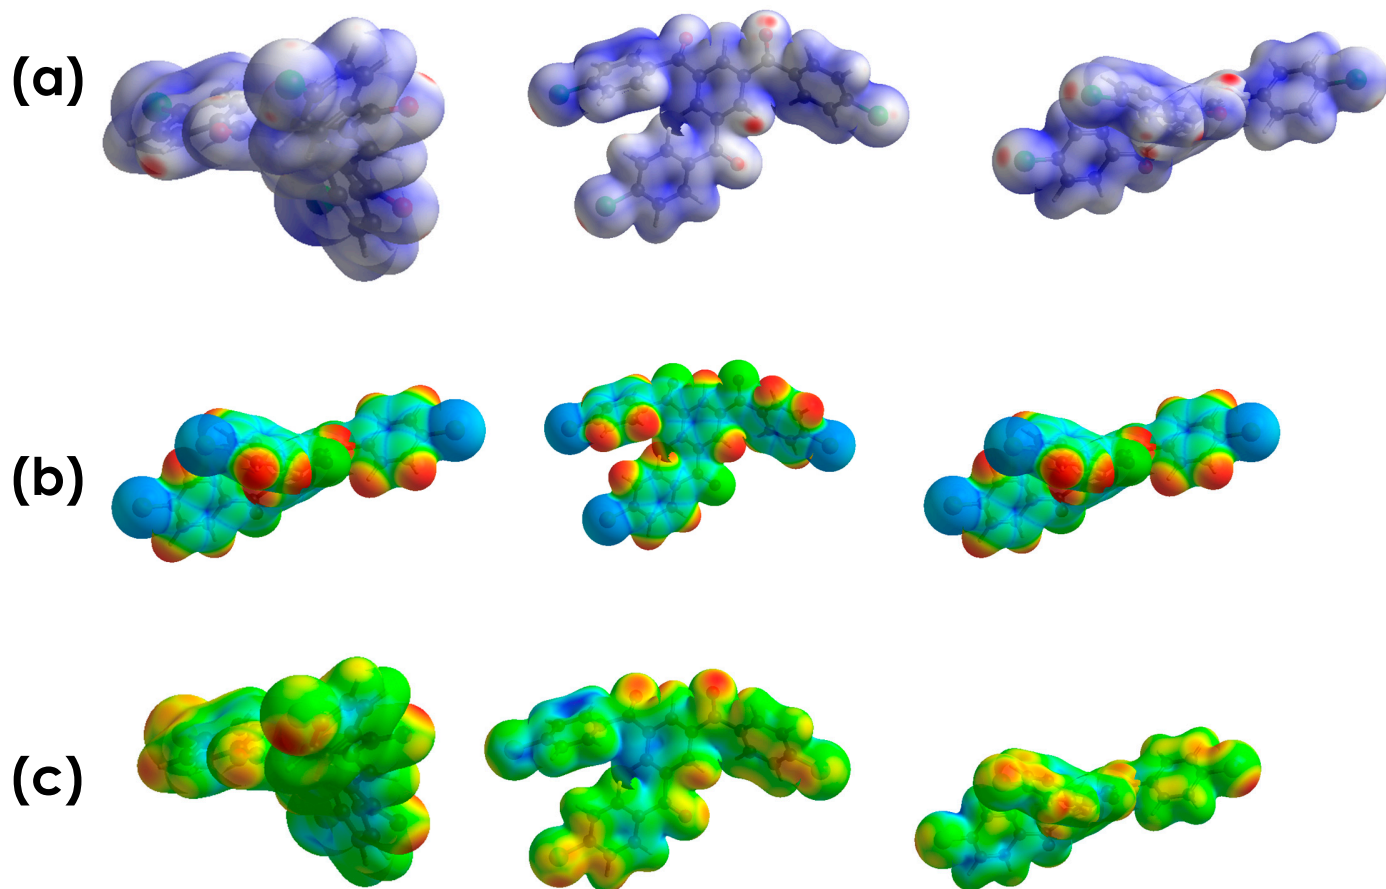

**Figure S8** Electrostatic Potential (PE) mapped on Hirshfeld surface of the molecule of **A**: (a) dnorm, (b) de, (c) di.

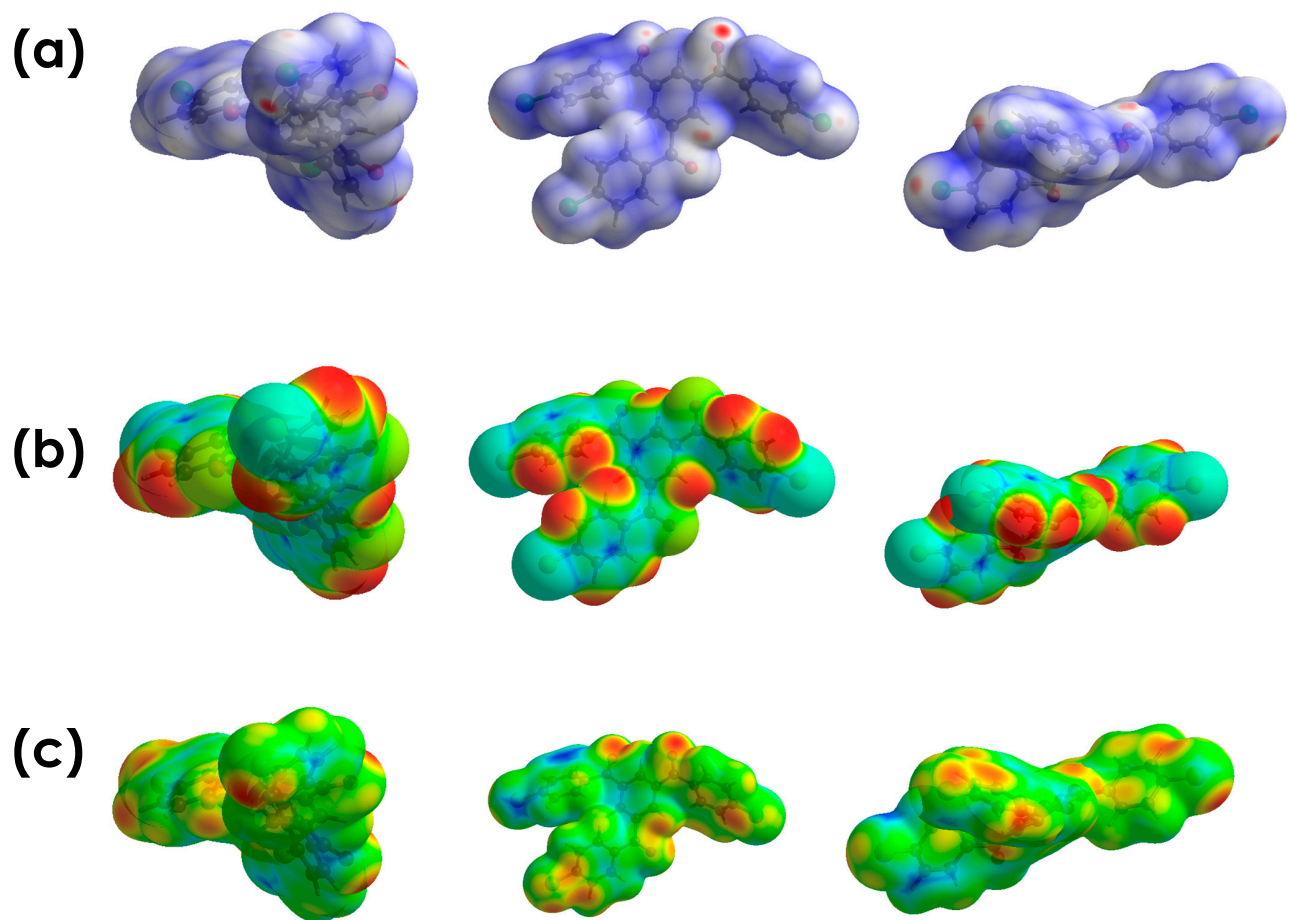

**Figure S9** Promolecule Density mapped on Hirshfeld surface of the molecule of **A**: (a) dnorm, (b) de, (c) di.
